# Supplementary material
Source: MDPI journal article supplement (https://www.mdpi.com/2072-4292/14/5/1272)
Supplement: s1 [file s1]

*Supplementary figures*

# Deep Learning Based Multispectral Image Reconstruction from Single Natural Color RGB Image – Enhancing UAV-Based Phenotyping

**Jiangsan Zhao<sup>1</sup>, Ajay Kumar<sup>2</sup>, Balaji Naik Banoth<sup>3</sup>, Balram Marathi<sup>3</sup>, Pachamuthu Rajalakshmi<sup>2</sup>, Boris Rewald<sup>4</sup>, Seishi Ninomiya<sup>1</sup>, Wei Guo<sup>1,\*</sup>**

<sup>1</sup> Graduate School of Agricultural and Life Sciences, The University of Tokyo, Tokyo, Japan; jiangsan-zhao@g.ecc.u-tokyo.ac.jp; snino@g.ecc.u-tokyo.ac.jp; guowei@g.ecc.u-tokyo.ac.jp

<sup>2</sup> Department of Electrical Engineering, Indian Institute of Technology, Hyderabad, Telangana, India; ee15resch02002@iith.ac.in; Raji@ee.iith.ac.in

<sup>3</sup> Professor Jayashankar Telangana State Agricultural University, Hyderabad, Telangana, India; bbalajinaik@pjtsau.in; balumarathi@pjtsau.edu.in

<sup>4</sup> Department of Forest and Soil Sciences, University of Natural Resources and Life Sciences, Vienna, Austria; boris.rewald@boku.ac.at

\* Correspondence: guowei@g.ecc.u-tokyo.ac.jp

**Table S1.** The Kullback divergence based mutual information (MI) between on ncRGB-Con image and ncRGB-Cam images of maize and rice on different DOYs in 2018 either without ( $MI_{or}$ ) or with ( $MI_{matched}$ ) histogram color matching.

| Images               | $MI_{or}$ | $MI_{matched}$ |
|----------------------|-----------|----------------|
| Maize, DOY 303, 2018 | 0.249     | 0.314          |
| Maize, DOY 313, 2018 | 0.265     | 0.285          |
| Maize, DOY 323, 2018 | 0.185     | 0.257          |
| Maize, DOY 354, 2018 | 0.547     | 0.650          |
| Rice, DOY 233, 2018  | 0.639     | 0.775          |
| Rice, DOY 270, 2018  | 0.156     | 0.367          |
| Rice, DOY 299, 2018  | 0.430     | 0.668          |
| Rice, DOY 328, 2018  | 0.174     | 0.227          |

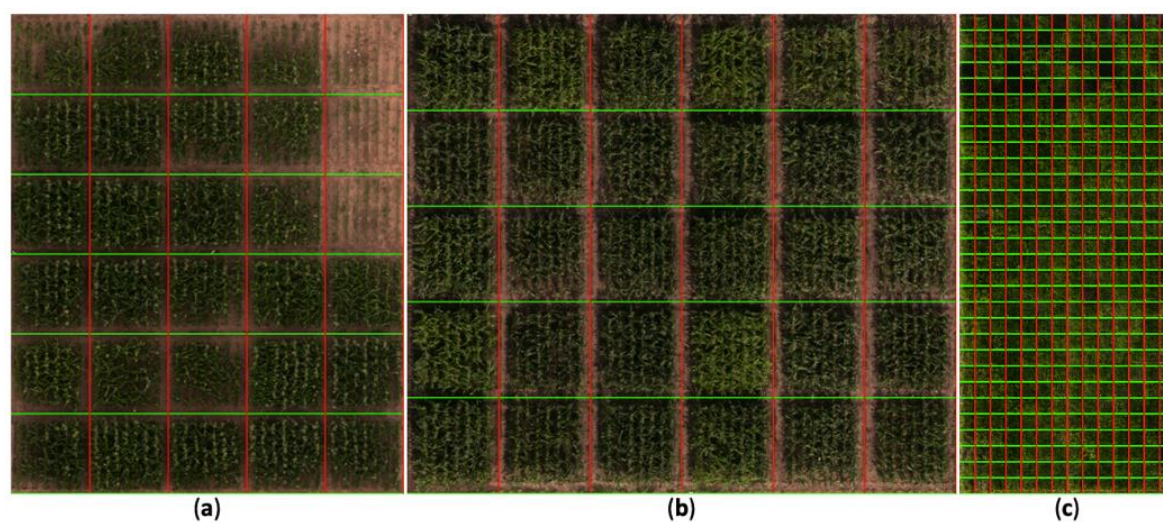

**Figure S1.** Examples of subplots in the fields of maize on DOY 354 in both 2018 (a) and 2019 (b), rice on DOY 328 in 2018 (c).

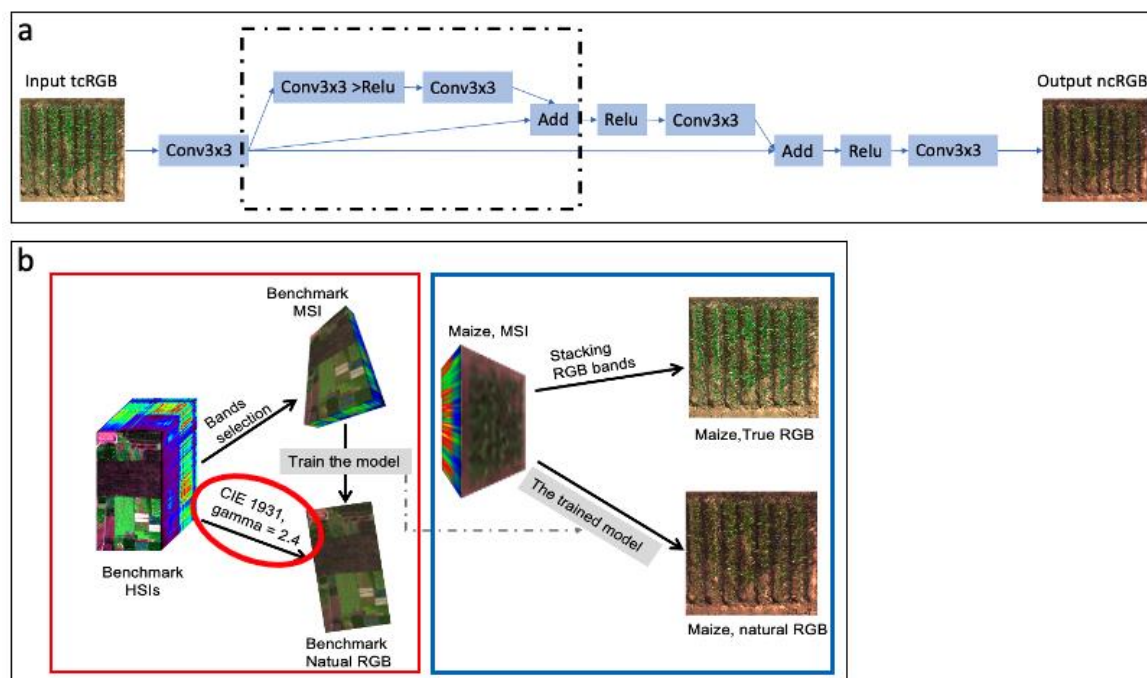

**Figure S2.** Model-TN for tcRGB to ncRGB image conversion. The architecture of Model-TN composed of only one residual block which is highlighted in dashed box is shown in (a). The whole process of ncRGB image conversion is shown in (b), model training in red box and prediction in blue box.

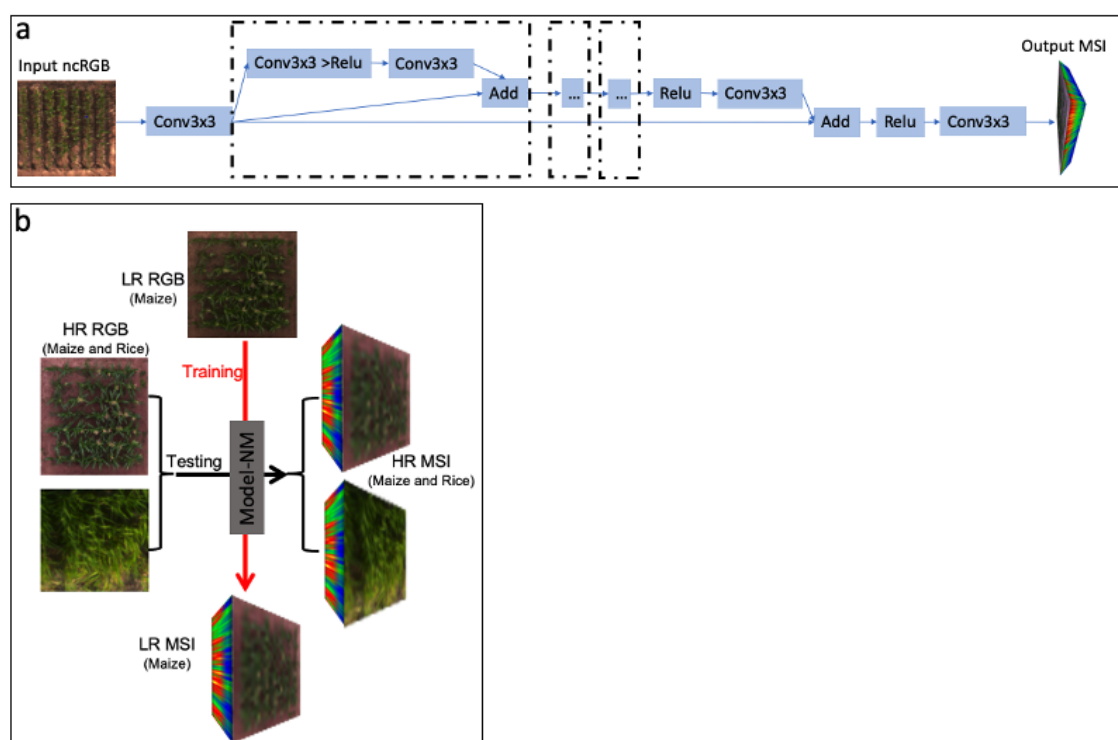

**Figure S3.** Model-NM for ncRGB image to MSIs conversion. The architecture of Model-NM composed of three residual blocks which are highlighted in dashed box is shown in (a). The whole conversion process from ncRGB image to MSIs is shown in (b).

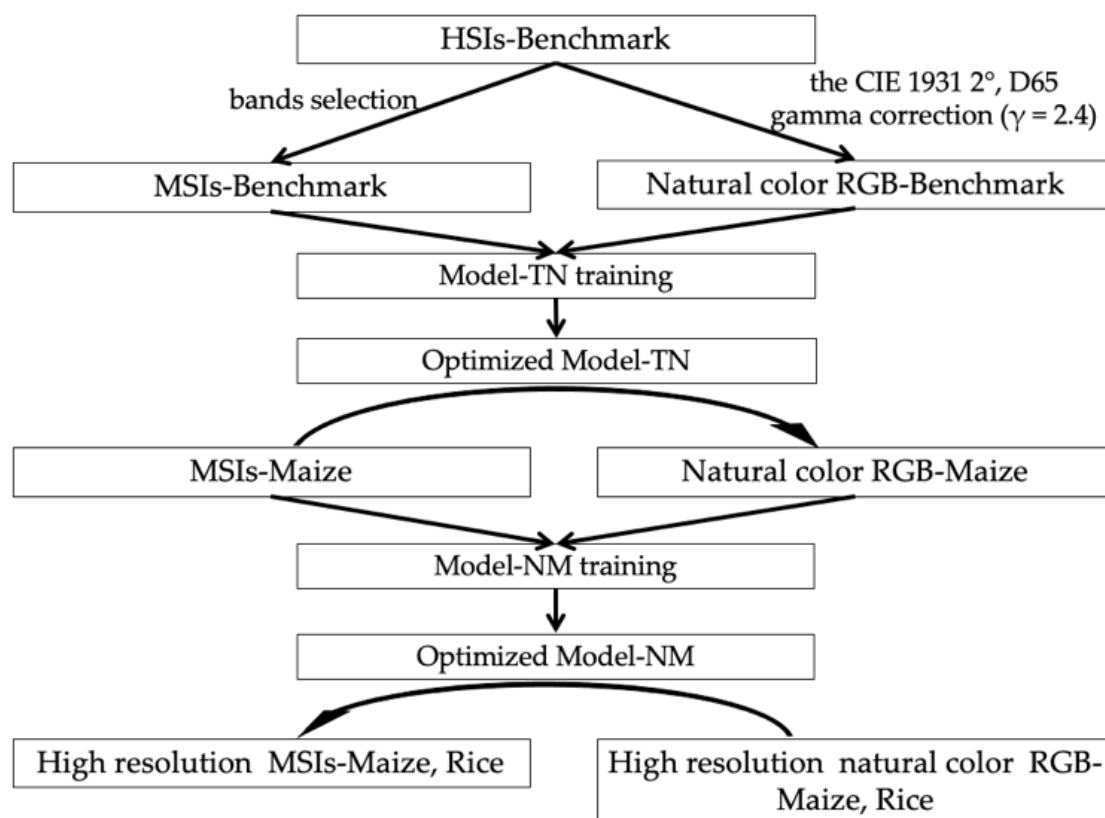

**Figure S4.** The flowchart of the detailed analysis.

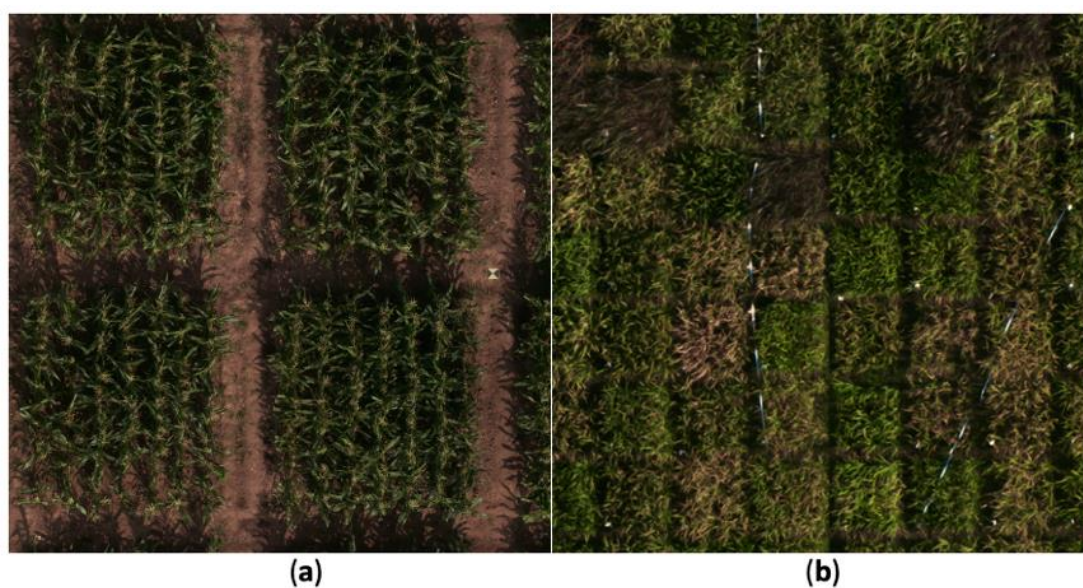

**Figure S5.** The ncRGB-Con images of maize on DOY 354 (a) and rice on DOY 328 in 2018 (b) used for visualization in Figures 3 and 4, respectively.
